# Supplementary material for: Identification and experimental validation of biomarkers associated with exercise in intervertebral disc degeneration through bulk RNA and single-cell RNA sequencing analysis
Source: Research Square preprint supplement (doi:10.21203/rs.3.rs-8535545/v1), 2026-02-02
Supplement: Supplementary file 1 [file 20d55c7b3b6c8b3e67703eb6.xlsx]

## Sheet: GO
ONTOLOGY	ID	Description	GeneRatio	BgRatio	pvalue	p.adjust	qvalue	geneID	Count	enrichment_factor
BP	GO:0045765	regulation of angiogenesis	11/113	349/18614	9.087584149590046e-6	0.006595240489574537	0.005826511844611708	CYP1B1/HYAL1/EMILIN1/SULF1/PTPRM/HIPK2/C5/PRKD1/CNMD/CHI3L1/TGFB2	11	5.191926363567208
BP	GO:1901342	regulation of vasculature development	11/113	355/18614	1.0663297914926343e-5	0.006595240489574537	0.005826511844611708	CYP1B1/HYAL1/EMILIN1/SULF1/PTPRM/HIPK2/C5/PRKD1/CNMD/CHI3L1/TGFB2	11	5.104175495450579
BP	GO:0010631	epithelial cell migration	11/113	371/18614	1.608171657337574e-5	0.006595240489574537	0.005826511844611708	CYP1B1/HYAL1/HAS2/PTPRM/ZEB2/KANK1/PLCG2/KANK2/S100A2/PRKD1/TGFB2	11	4.884049328530878
BP	GO:0090132	epithelium migration	11/113	374/18614	1.7327998104485318e-5	0.006595240489574537	0.005826511844611708	CYP1B1/HYAL1/HAS2/PTPRM/ZEB2/KANK1/PLCG2/KANK2/S100A2/PRKD1/TGFB2	11	4.84487246225924
BP	GO:0090130	tissue migration	11/113	379/18614	1.959185662875495e-5	0.006595240489574537	0.005826511844611708	CYP1B1/HYAL1/HAS2/PTPRM/ZEB2/KANK1/PLCG2/KANK2/S100A2/PRKD1/TGFB2	11	4.780955939010437
BP	GO:0030198	extracellular matrix organization	10/113	314/18614	2.1656563930402762e-5	0.006595240489574537	0.005826511844611708	FOXF2/CYP1B1/EMILIN1/HAS2/SULF1/NTN4/COL11A2/COL8A2/COL10A1/TGFB2	10	5.2460402457584125
BP	GO:0043062	extracellular structure organization	10/113	315/18614	2.225400973193886e-5	0.006595240489574537	0.005826511844611708	FOXF2/CYP1B1/EMILIN1/HAS2/SULF1/NTN4/COL11A2/COL8A2/COL10A1/TGFB2	10	5.229386149740132
BP	GO:0045229	external encapsulating structure organization	10/113	317/18614	2.3491506641405294e-5	0.006595240489574537	0.005826511844611708	FOXF2/CYP1B1/EMILIN1/HAS2/SULF1/NTN4/COL11A2/COL8A2/COL10A1/TGFB2	10	5.196393177186566
BP	GO:0007584	response to nutrient	7/113	156/18614	4.6613176063361016e-5	0.011632577048700982	0.010276706067770236	CCND1/CYP1B1/KYNU/BCKDHB/KANK2/SOD2/GDAP1	7	7.391536192421148
BP	GO:0030509	BMP signaling pathway	7/113	176/18614	9.9749603662499e-5	0.021774464779712673	0.01923647471985677	DLX3/SULF1/TNFAIP6/HIPK2/SPART/UBE2D1/TGFB2	7	6.551588897827836
BP	GO:0090288	negative regulation of cellular response to growth factor stimulus	6/113	127/18614	1.247153586411393e-4	0.021774464779712673	0.01923647471985677	EMILIN1/SULF1/TNFAIP6/HIPK2/SPART/UBE2D1	6	7.7823148212668105
BP	GO:0045766	positive regulation of angiogenesis	7/113	185/18614	1.3605344648818526e-4	0.021774464779712673	0.01923647471985677	CYP1B1/HYAL1/EMILIN1/HIPK2/C5/PRKD1/CHI3L1	7	6.232862951447022
BP	GO:1904018	positive regulation of vasculature development	7/113	185/18614	1.3605344648818526e-4	0.021774464779712673	0.01923647471985677	CYP1B1/HYAL1/EMILIN1/HIPK2/C5/PRKD1/CHI3L1	7	6.232862951447022
BP	GO:0071772	response to BMP	7/113	187/18614	1.4542162586629124e-4	0.021774464779712673	0.01923647471985677	DLX3/SULF1/TNFAIP6/HIPK2/SPART/UBE2D1/TGFB2	7	6.166201315602669
BP	GO:0071773	cellular response to BMP stimulus	7/113	187/18614	1.4542162586629124e-4	0.021774464779712673	0.01923647471985677	DLX3/SULF1/TNFAIP6/HIPK2/SPART/UBE2D1/TGFB2	7	6.166201315602669
BP	GO:0050673	epithelial cell proliferation	11/113	488/18614	1.8824312729829814e-4	0.026145323584041875	0.023097874563396417	CCND1/HYAL1/IGFBP3/HAS2/SULF1/PTPRM/BID/COL8A2/PRKD1/CNMD/TGFB2	11	3.7130784854199916
BP	GO:0033273	response to vitamin	5/113	88/18614	1.9789425686941758e-4	0.026145323584041875	0.023097874563396417	CCND1/KYNU/KANK2/SOD2/GDAP1	5	9.359412711182623
BP	GO:0001667	ameboidal-type cell migration	11/113	496/18614	2.1659194345185475e-4	0.027025861388492542	0.023875778561798025	CYP1B1/HYAL1/HAS2/PTPRM/ZEB2/KANK1/PLCG2/KANK2/S100A2/PRKD1/TGFB2	11	3.653190122751927
BP	GO:0006029	proteoglycan metabolic process	5/113	95/18614	2.8300022921899767e-4	0.03338633242466853	0.02949488523246013	HYAL1/SULF1/CHST10/UST/CNMD	5	8.669771774569167
BP	GO:0008064	regulation of actin polymerization or depolymerization	6/113	149/18614	2.972959254200225e-4	0.03338633242466853	0.02949488523246013	EPS8/CYFIP2/CFL2/KANK1/CAPG/ARHGAP18	6	6.633248203361644
BP	GO:0030832	regulation of actin filament length	6/113	152/18614	3.3085697487917145e-4	0.03538594121802948	0.031261423440964324	EPS8/CYFIP2/CFL2/KANK1/CAPG/ARHGAP18	6	6.502328830926875
BP	GO:0019835	cytolysis	3/113	23/18614	3.530969774903765e-4	0.0360479914292448	0.031846306343031566	MMD/MICB/C5	3	21.485956136975762
BP	GO:0030336	negative regulation of cell migration	9/113	375/18614	4.7000909135189433e-4	0.04589740952940673	0.04054769506628471	CYP1B1/EMILIN1/IGFBP3/SULF1/PTPRM/TNFAIP6/KANK1/C5/CDH11	9	3.9534159292035396
BP	GO:0090092	regulation of transmembrane receptor protein serine/threonine kinase signaling pathway	8/113	301/18614	5.021471983084634e-4	0.046992608641700365	0.04151523986015147	EMILIN1/SULF1/TNFAIP6/ZEB2/HIPK2/SPART/UBE2D1/TGFB2	8	4.3780907300149945
BP	GO:0046173	polyol biosynthetic process	4/113	62/18614	5.476828709509465e-4	0.049203829126233035	0.0434687247049488	QDPR/PLCG2/IP6K3/SPTSSB	4	10.627462175278334
BP	GO:0030199	collagen fibril organization	4/113	64/18614	6.18023285899116e-4	0.05180557285588905	0.04576721415070106	CYP1B1/EMILIN1/COL11A2/TGFB2	4	10.295353982300885
BP	GO:2000146	negative regulation of cell motility	9/113	390/18614	6.22774028098399e-4	0.05180557285588905	0.04576721415070106	CYP1B1/EMILIN1/IGFBP3/SULF1/PTPRM/TNFAIP6/KANK1/C5/CDH11	9	3.8013614703880187
BP	GO:0010575	positive regulation of vascular endothelial growth factor production	3/113	29/18614	7.094708931446012e-4	0.05371330716934737	0.0474525865933448	CYP1B1/SULF1/C5	3	17.040585901739394
BP	GO:0007178	transmembrane receptor protein serine/threonine kinase signaling pathway	9/113	398/18614	7.195771039145419e-4	0.05371330716934737	0.0474525865933448	DLX3/EMILIN1/SULF1/TNFAIP6/ZEB2/HIPK2/SPART/UBE2D1/TGFB2	9	3.724952194601325
BP	GO:0019751	polyol metabolic process	5/113	117/18614	7.363764271917389e-4	0.05371330716934737	0.0474525865933448	QDPR/PLA2G4A/PLCG2/IP6K3/SPTSSB	5	7.039558278496331
BP	GO:0009100	glycoprotein metabolic process	9/113	401/18614	7.589081720715554e-4	0.05371330716934737	0.0474525865933448	HYAL1/SULF1/TMTC1/EDEM3/CHST10/SOAT1/MAN1A1/UST/CNMD	9	3.697084721823759
BP	GO:0030510	regulation of BMP signaling pathway	5/113	118/18614	7.652830941313962e-4	0.05371330716934737	0.0474525865933448	SULF1/TNFAIP6/HIPK2/SPART/UBE2D1	5	6.9799010049497525
BP	GO:0090066	regulation of anatomical structure size	10/113	492/18614	8.298234495288521e-4	0.0559864336354032	0.049460761776601685	EPS8/CYFIP2/CFL2/KANK1/SPART/CAPG/KCNN4/ARHGAP18/SOD2/NPR3	10	3.3480825958702063
BP	GO:0030514	negative regulation of BMP signaling pathway	4/113	70/18614	8.673153814721132e-4	0.0559864336354032	0.049460761776601685	TNFAIP6/HIPK2/SPART/UBE2D1	4	9.412895069532238
BP	GO:0043254	regulation of protein-containing complex assembly	9/113	409/18614	8.724511029559713e-4	0.0559864336354032	0.049460761776601685	EPS8/CYFIP2/KANK1/PLCG2/BMF/BID/CAPG/ARHGAP18/PRKD1	9	3.6247701062379645
BP	GO:0006022	aminoglycan metabolic process	5/113	126/18614	0.0010280606719882076	0.06151822235909767	0.05434777576364958	HYAL1/HAS2/TNFAIP6/UST/CHI3L1	5	6.5367326871751645
BP	GO:0050678	regulation of epithelial cell proliferation	9/113	419/18614	0.0010334695650690022	0.06151822235909767	0.05434777576364958	CCND1/HYAL1/HAS2/SULF1/PTPRM/BID/PRKD1/CNMD/TGFB2	9	3.5382600798361037
BP	GO:0048566	embryonic digestive tract development	3/113	33/18614	0.0010408247772242705	0.06151822235909767	0.05434777576364958	FOXF2/RARB/TGFB2	3	14.975060337892197
BP	GO:0042698	ovulation cycle	4/113	75/18614	0.0011233285320599664	0.061770600401580715	0.054570737103144605	CYP1B1/HAS2/TNFAIP6/TGFB2	4	8.785368731563421
BP	GO:0008154	actin polymerization or depolymerization	6/113	192/18614	0.001128821873688994	0.061770600401580715	0.054570737103144605	EPS8/CYFIP2/CFL2/KANK1/CAPG/ARHGAP18	6	5.147676991150442
BP	GO:0040013	negative regulation of locomotion	9/113	427/18614	0.001178982401330028	0.061770600401580715	0.054570737103144605	CYP1B1/EMILIN1/IGFBP3/SULF1/PTPRM/TNFAIP6/KANK1/C5/CDH11	9	3.471969492860252
BP	GO:0030833	regulation of actin filament polymerization	5/113	130/18614	0.0011820983332777044	0.061770600401580715	0.054570737103144605	EPS8/CYFIP2/KANK1/CAPG/ARHGAP18	5	6.335602450646698
BP	GO:0090287	regulation of cellular response to growth factor stimulus	8/113	345/18614	0.0012155407888669943	0.061770600401580715	0.054570737103144605	EMILIN1/CYFIP2/SULF1/TNFAIP6/ZEB2/HIPK2/SPART/UBE2D1	8	3.8197255354623576
BP	GO:0030212	hyaluronan metabolic process	3/113	35/18614	0.001237612207511635	0.061770600401580715	0.054570737103144605	HYAL1/HAS2/TNFAIP6	3	14.119342604298357
BP	GO:0048048	embryonic eye morphogenesis	3/113	35/18614	0.001237612207511635	0.061770600401580715	0.054570737103144605	FOXF2/HIPK2/RARB	3	14.119342604298357
BP	GO:0032535	regulation of cellular component size	8/113	354/18614	0.0014311197943832823	0.0693615675875291	0.061276915640667534	EPS8/CYFIP2/CFL2/KANK1/SPART/CAPG/KCNN4/ARHGAP18	8	3.7226138693065347
BP	GO:0061448	connective tissue development	7/113	275/18614	0.0014514664633187297	0.0693615675875291	0.061276915640667534	HYAL1/SULF1/SPART/COL11A2/RARB/CNMD/CHI3L1	7	4.193016894609815
BP	GO:0051216	cartilage development	6/113	203/18614	0.0015009670444241687	0.07023274962034756	0.062046554358323645	HYAL1/SULF1/COL11A2/RARB/CNMD/CHI3L1	6	4.868738829068399
BP	GO:1904587	response to glycoprotein	2/113	10/18614	0.0015923329451990264	0.07272434462442666	0.06424773380374198	EDEM3/MAN1A1	2	32.94513274336283
BP	GO:0050878	regulation of body fluid levels	8/113	361/18614	0.0016189747244974768	0.07272434462442666	0.06424773380374198	TFPI/CCND1/EMILIN1/HAS2/PLA2G4A/PLCG2/KCNN4/NPR3	8	3.6504302208712276
BP	GO:1901879	regulation of protein depolymerization	4/113	86/18614	0.0018649645449015397	0.08213157584017369	0.07255847610194846	ASPH/EPS8/CFL2/CAPG	4	7.66165877752624
BP	GO:1902806	regulation of cell cycle G1/S phase transition	6/113	214/18614	0.0019601143411112337	0.08466186173338136	0.07479383670029707	CCND1/PSME1/HYAL1/PLCG2/KANK2/BID	6	4.6184765528078735
BP	GO:0085029	extracellular matrix assembly	3/113	42/18614	0.0021049115446099623	0.08920059111686746	0.078803540448655	EMILIN1/HAS2/NTN4	3	11.766118836915297
BP	GO:0016525	negative regulation of angiogenesis	5/113	151/18614	0.002285487148267942	0.09292664754082676	0.08209529484672563	EMILIN1/SULF1/PTPRM/CNMD/TGFB2	5	5.454492176053448
BP	GO:0060021	roof of mouth development	4/113	91/18614	0.002293466814652045	0.09292664754082676	0.08209529484672563	FOXF2/ASPH/COL11A2/TGFB2	4	7.240688515024798
BP	GO:0035810	positive regulation of urine volume	2/113	12/18614	0.00231696004554154	0.09292664754082676	0.08209529484672563	HAS2/NPR3	2	27.454277286135692
BP	GO:0048608	reproductive structure development	7/113	301/18614	0.0024190161304990334	0.09370670660933073	0.08278443171888664	FOXF2/CCND1/CYP1B1/SULF1/TNFAIP6/IRX5/TGFB2	7	3.83082938876312
BP	GO:2000181	negative regulation of blood vessel morphogenesis	5/113	153/18614	0.002419852619475148	0.09370670660933073	0.08278443171888664	EMILIN1/SULF1/PTPRM/CNMD/TGFB2	5	5.383191624732489
BP	GO:1901343	negative regulation of vasculature development	5/113	154/18614	0.002489148613067451	0.09475640313473721	0.08371177762055568	EMILIN1/SULF1/PTPRM/CNMD/TGFB2	5	5.348235834961498
BP	GO:0061458	reproductive system development	7/113	305/18614	0.00260382544903884	0.0972335717771239	0.08590021221346887	FOXF2/CCND1/CYP1B1/SULF1/TNFAIP6/IRX5/TGFB2	7	3.780589003336718
BP	GO:0048592	eye morphogenesis	5/113	157/18614	0.002705695157433741	0.0972335717771239	0.08590021221346887	FOXF2/PTPRM/HIPK2/COL8A2/RARB	5	5.2460402457584125
BP	GO:0060100	positive regulation of phagocytosis, engulfment	2/113	13/18614	0.0027273887007830833	0.0972335717771239	0.08590021221346887	PLCG2/RAB31	2	25.342409802586793
BP	GO:1905155	positive regulation of membrane invagination	2/113	13/18614	0.0027273887007830833	0.0972335717771239	0.08590021221346887	PLCG2/RAB31	2	25.342409802586793
BP	GO:1903510	mucopolysaccharide metabolic process	4/113	96/18614	0.00278541815735365	0.09775076845962966	0.08635712543769129	HYAL1/HAS2/TNFAIP6/UST	4	6.863569321533923
BP	GO:1905314	semi-lunar valve development	3/113	47/18614	0.0029084737525170807	0.10049895458697482	0.08878498823473194	EMILIN1/CDH11/TGFB2	3	10.514404067030691
BP	GO:0030041	actin filament polymerization	5/113	162/18614	0.003096497310419379	0.10169138616612688	0.08983843226468069	EPS8/CYFIP2/KANK1/CAPG/ARHGAP18	5	5.084125423358461
BP	GO:0030213	hyaluronan biosynthetic process	2/113	14/18614	0.0031693664432897958	0.10169138616612688	0.08983843226468069	HYAL1/HAS2	2	23.532237673830593
BP	GO:0032306	regulation of prostaglandin secretion	2/113	14/18614	0.0031693664432897958	0.10169138616612688	0.08983843226468069	PLA2G4A/PTGES	2	23.532237673830593
BP	GO:0032308	positive regulation of prostaglandin secretion	2/113	14/18614	0.0031693664432897958	0.10169138616612688	0.08983843226468069	PLA2G4A/PTGES	2	23.532237673830593
BP	GO:1905522	negative regulation of macrophage migration	2/113	14/18614	0.0031693664432897958	0.10169138616612688	0.08983843226468069	EMILIN1/C5	2	23.532237673830593
BP	GO:0006911	phagocytosis, engulfment	3/113	49/18614	0.003275806598957594	0.10218696696192717	0.09027624910869977	PLCG2/ELMO1/RAB31	3	10.08524471735597
BP	GO:0032892	positive regulation of organic acid transport	3/113	49/18614	0.003275806598957594	0.10218696696192717	0.09027624910869977	CLTRN/PLA2G4A/PTGES	3	10.08524471735597
BP	GO:1901617	organic hydroxy compound biosynthetic process	6/113	242/18614	0.0036068112498799476	0.10764551879124387	0.09509856255401165	QDPR/ZEB2/PLCG2/IP6K3/SPTSSB/TGFB2	6	4.0841073648796895
BP	GO:0045838	positive regulation of membrane potential	2/113	15/18614	0.0036425019715647967	0.10764551879124387	0.09509856255401165	GLRX/BID	2	21.963421828908555
BP	GO:0060099	regulation of phagocytosis, engulfment	2/113	15/18614	0.0036425019715647967	0.10764551879124387	0.09509856255401165	PLCG2/RAB31	2	21.963421828908555
BP	GO:1905153	regulation of membrane invagination	2/113	15/18614	0.0036425019715647967	0.10764551879124387	0.09509856255401165	PLCG2/RAB31	2	21.963421828908555
BP	GO:0090101	negative regulation of transmembrane receptor protein serine/threonine kinase signaling pathway	5/113	169/18614	0.0037099974596437723	0.10821628953714173	0.0956028053510391	EMILIN1/TNFAIP6/HIPK2/SPART/UBE2D1	5	4.873540346651306
BP	GO:0030834	regulation of actin filament depolymerization	3/113	53/18614	0.004092710272612512	0.11497322522285679	0.10157216550831186	EPS8/CFL2/CAPG	3	9.32409417264986
BP	GO:0009074	aromatic amino acid family catabolic process	2/113	16/18614	0.004146407499132413	0.11497322522285679	0.10157216550831186	QDPR/KYNU	2	20.59070796460177
BP	GO:0044849	estrous cycle	2/113	16/18614	0.004146407499132413	0.11497322522285679	0.10157216550831186	CYP1B1/HAS2	2	20.59070796460177
BP	GO:0051014	actin filament severing	2/113	16/18614	0.004146407499132413	0.11497322522285679	0.10157216550831186	CFL2/CAPG	2	20.59070796460177
BP	GO:1901136	carbohydrate derivative catabolic process	5/113	175/18614	0.0043015017894649345	0.11781918316022248	0.10408640401978693	HYAL1/EDEM3/GPD1L/MAN1A1/CHI3L1	5	4.706447534766119
BP	GO:0010634	positive regulation of epithelial cell migration	5/113	176/18614	0.004406256178038344	0.11923435392619423	0.10533662518202003	HYAL1/HAS2/PLCG2/PRKD1/TGFB2	5	4.679706355591311
BP	GO:0002686	negative regulation of leukocyte migration	3/113	55/18614	0.00454345617919448	0.1214833640294143	0.1073234949596691	EMILIN1/TNFAIP6/C5	3	8.985036202735317
BP	GO:0048545	response to steroid hormone	7/113	339/18614	0.004647824755878491	0.12224243419322138	0.10799408935380904	TFPI/CCND1/CYP1B1/BCKDHB/SMYD3/KANK2/TGFB2	7	3.401414885007962
BP	GO:1901201	regulation of extracellular matrix assembly	2/113	17/18614	0.004680698726899839	0.12224243419322138	0.10799408935380904	EMILIN1/HAS2	2	19.379489849036958
BP	GO:0051402	neuron apoptotic process	6/113	259/18614	0.005011680237719835	0.12294456677348468	0.10861438270048208	CCND1/PPT1/BID/HIPK2/SOD2/TGFB2	6	3.8160385417022584
BP	GO:0006957	complement activation, alternative pathway	2/113	18/18614	0.005244994815720115	0.12294456677348468	0.10861438270048208	C5/CFB	2	18.30285152409046
BP	GO:0032310	prostaglandin secretion	2/113	18/18614	0.005244994815720115	0.12294456677348468	0.10861438270048208	PLA2G4A/PTGES	2	18.30285152409046
BP	GO:0036507	protein demannosylation	2/113	18/18614	0.005244994815720115	0.12294456677348468	0.10861438270048208	EDEM3/MAN1A1	2	18.30285152409046
BP	GO:0036508	protein alpha-1,2-demannosylation	2/113	18/18614	0.005244994815720115	0.12294456677348468	0.10861438270048208	EDEM3/MAN1A1	2	18.30285152409046
BP	GO:0001836	release of cytochrome c from mitochondria	3/113	58/18614	0.005273967720968688	0.12294456677348468	0.10861438270048208	BMF/BID/SOD2	3	8.520292950869697
BP	GO:0006956	complement activation	3/113	58/18614	0.005273967720968688	0.12294456677348468	0.10861438270048208	C4BPA/C5/CFB	3	8.520292950869697
BP	GO:0030042	actin filament depolymerization	3/113	58/18614	0.005273967720968688	0.12294456677348468	0.10861438270048208	EPS8/CFL2/CAPG	3	8.520292950869697
BP	GO:0048010	vascular endothelial growth factor receptor signaling pathway	3/113	58/18614	0.005273967720968688	0.12294456677348468	0.10861438270048208	EMILIN1/SULF1/PRKD1	3	8.520292950869697
BP	GO:0099024	plasma membrane invagination	3/113	58/18614	0.005273967720968688	0.12294456677348468	0.10861438270048208	PLCG2/ELMO1/RAB31	3	8.520292950869697
BP	GO:0051261	protein depolymerization	4/113	115/18614	0.005309716374455928	0.12294456677348468	0.10861438270048208	ASPH/EPS8/CFL2/CAPG	4	5.729588303193536
BP	GO:0010574	regulation of vascular endothelial growth factor production	3/113	59/18614	0.0055322274798991385	0.12604914737258088	0.1113570993097975	CYP1B1/SULF1/C5	3	8.375881205939702
BP	GO:2000045	regulation of G1/S transition of mitotic cell cycle	5/113	186/18614	0.005556039888640029	0.12604914737258088	0.1113570993097975	CCND1/PSME1/HYAL1/KANK2/BID	5	4.428109239699305
BP	GO:0030203	glycosaminoglycan metabolic process	4/113	117/18614	0.005641758247217466	0.1267138902325043	0.11194436101057814	HYAL1/HAS2/TNFAIP6/UST	4	5.6316466227970645
BP	GO:0003179	heart valve morphogenesis	3/113	60/18614	0.005797964217010582	0.1285706924966883	0.11358473794641115	EMILIN1/CDH11/TGFB2	3	8.236283185840707
BP	GO:0097202	activation of cysteine-type endopeptidase activity	2/113	19/18614	0.005838918359155034	0.1285706924966883	0.11358473794641115	ASPH/CYFIP2	2	17.339543549138334
BP	GO:0110053	regulation of actin filament organization	6/113	268/18614	0.005900634378850314	0.12866820208638646	0.11367088200442353	EPS8/CYFIP2/CFL2/KANK1/CAPG/ARHGAP18	6	3.687887993660018
BP	GO:0002822	regulation of adaptive immune response based on somatic recombination of immune receptors built from immunoglobulin superfamily domains	5/113	190/18614	0.00607034847855102	0.13109617964255377	0.11581585913024973	C4BPA/PLA2G4A/CD80/MICB/CD1D	5	4.3348858872845835
BP	GO:0032271	regulation of protein polymerization	5/113	191/18614	0.006203989712005264	0.1327062942206078	0.1172383018258639	EPS8/CYFIP2/KANK1/CAPG/ARHGAP18	5	4.312190149654821
BP	GO:1900227	positive regulation of NLRP3 inflammasome complex assembly	2/113	20/18614	0.006462095356436781	0.1369232657599718	0.1209637512103608	PLCG2/PRKD1	2	16.472566371681413
BP	GO:0090100	positive regulation of transmembrane receptor protein serine/threonine kinase signaling pathway	4/113	122/18614	0.006531864644621876	0.13710811207309095	0.12112705218998758	SULF1/ZEB2/HIPK2/TGFB2	4	5.40084143333817
BP	GO:0010573	vascular endothelial growth factor production	3/113	63/18614	0.0066405927748586085	0.13809973492900404	0.12200309337825029	CYP1B1/SULF1/C5	3	7.844079224610198
BP	GO:0043244	regulation of protein-containing complex disassembly	4/113	123/18614	0.006720407385368812	0.13847738520677386	0.12233672546035937	ASPH/EPS8/CFL2/CAPG	4	5.35693215339233
BP	GO:0006066	alcohol metabolic process	7/113	366/18614	0.006992177250324939	0.14140170395502127	0.12492019119614524	CYP1B1/QDPR/PLA2G4A/PLCG2/IP6K3/SOAT1/SPTSSB	7	3.150490836113932
BP	GO:0032305	positive regulation of icosanoid secretion	2/113	21/18614	0.007114155185626627	0.14140170395502127	0.12492019119614524	PLA2G4A/PTGES	2	15.688158449220397
BP	GO:0035809	regulation of urine volume	2/113	21/18614	0.007114155185626627	0.14140170395502127	0.12492019119614524	HAS2/NPR3	2	15.688158449220397
BP	GO:1903428	positive regulation of reactive oxygen species biosynthetic process	2/113	21/18614	0.007114155185626627	0.14140170395502127	0.12492019119614524	PLCG2/SOD2	2	15.688158449220397
BP	GO:0010324	membrane invagination	3/113	65/18614	0.007240718185650078	0.1414143743040876	0.12493138471350479	PLCG2/ELMO1/RAB31	3	7.602722940776038
BP	GO:0030837	negative regulation of actin filament polymerization	3/113	65/18614	0.007240718185650078	0.1414143743040876	0.12493138471350479	EPS8/KANK1/CAPG	3	7.602722940776038
BP	GO:0044843	cell cycle G1/S phase transition	6/113	281/18614	0.0073811067381004455	0.14291349770494483	0.12625577315171815	CCND1/PSME1/HYAL1/PLCG2/KANK2/BID	6	3.5172739583661383
BP	GO:0048593	camera-type eye morphogenesis	4/113	127/18614	0.007510602997243967	0.1441779002718799	0.12737279936846496	FOXF2/PTPRM/HIPK2/COL8A2	4	5.188209880844541
BP	GO:0007548	sex differentiation	6/113	283/18614	0.007630694425759216	0.14524186169707795	0.12831274748042928	FOXF2/CCND1/CYP1B1/TNFAIP6/IRX5/TGFB2	6	3.4924168985896995
BP	GO:0032303	regulation of icosanoid secretion	2/113	22/18614	0.007794730576969676	0.14589137396561574	0.1288865538384898	PLA2G4A/PTGES	2	14.975060337892195
BP	GO:0034312	diol biosynthetic process	2/113	22/18614	0.007794730576969676	0.14589137396561574	0.1288865538384898	QDPR/SPTSSB	2	14.975060337892195
BP	GO:1902903	regulation of supramolecular fiber organization	7/113	376/18614	0.008052269653634795	0.14946609621540288	0.1320446132849203	EPS8/EMILIN1/CYFIP2/CFL2/KANK1/CAPG/ARHGAP18	7	3.066701186217285
BP	GO:1902808	positive regulation of cell cycle G1/S phase transition	3/113	68/18614	0.008199434486919366	0.1509502447345975	0.13335577228509926	CCND1/HYAL1/PLCG2	3	7.26730869338886
BP	GO:0002819	regulation of adaptive immune response	5/113	205/18614	0.008298446542660926	0.15153098320988975	0.13386882099200553	C4BPA/PLA2G4A/CD80/MICB/CD1D	5	4.017699115044247
BP	GO:0002689	negative regulation of leukocyte chemotaxis	2/113	23/18614	0.008503457586443894	0.15279012591322388	0.13498120042481468	TNFAIP6/C5	2	14.32397075798384
BP	GO:0071305	cellular response to vitamin D	2/113	23/18614	0.008503457586443894	0.15279012591322388	0.13498120042481468	KANK2/GDAP1	2	14.32397075798384
BP	GO:0031667	response to nutrient levels	8/113	477/18614	0.008617626233887862	0.1536126073120011	0.13570781496139198	CCND1/CYP1B1/KYNU/BCKDHB/KANK2/PRKD1/SOD2/GDAP1	8	2.7626945696740317
BP	GO:0051881	regulation of mitochondrial membrane potential	3/113	70/18614	0.008878112084511492	0.15578312298291258	0.13762533946796185	BID/SPART/SOD2	3	7.059671302149178
BP	GO:2000379	positive regulation of reactive oxygen species metabolic process	3/113	70/18614	0.008878112084511492	0.15578312298291258	0.13762533946796185	CYP1B1/PLCG2/SOD2	3	7.059671302149178
BP	GO:0001654	eye development	7/113	385/18614	0.009104042678301961	0.15752666742969673	0.1391656597014474	FOXF2/CYP1B1/PTPRM/HIPK2/COL8A2/RARB/TGFB2	7	2.9950120675784393
BP	GO:0010842	retina layer formation	2/113	24/18614	0.009239975569502465	0.15752666742969673	0.1391656597014474	PTPRM/HIPK2	2	13.727138643067846
BP	GO:0036120	cellular response to platelet-derived growth factor stimulus	2/113	24/18614	0.009239975569502465	0.15752666742969673	0.1391656597014474	HYAL1/HAS2	2	13.727138643067846
BP	GO:0010632	regulation of epithelial cell migration	6/113	295/18614	0.009258023197114856	0.15752666742969673	0.1391656597014474	HYAL1/HAS2/PTPRM/PLCG2/PRKD1/TGFB2	6	3.3503524823758815
BP	GO:0006024	glycosaminoglycan biosynthetic process	3/113	72/18614	0.009588792976480654	0.15975840795753304	0.14113727281246183	HYAL1/HAS2/UST	3	6.863569321533923
BP	GO:1904888	cranial skeletal system development	3/113	72/18614	0.009588792976480654	0.15975840795753304	0.14113727281246183	IRX5/RAB23/TGFB2	3	6.863569321533923
BP	GO:0150063	visual system development	7/113	389/18614	0.009602575723182084	0.15975840795753304	0.14113727281246183	FOXF2/CYP1B1/PTPRM/HIPK2/COL8A2/RARB/TGFB2	7	2.9642150283231343
BP	GO:0003170	heart valve development	3/113	73/18614	0.009956227399894732	0.16049157421534066	0.14178498261044997	EMILIN1/CDH11/TGFB2	3	6.769547823978664
BP	GO:0002475	antigen processing and presentation via MHC class Ib	2/113	25/18614	0.010003927155007876	0.16049157421534066	0.14178498261044997	MICB/CD1D	2	13.178053097345133
BP	GO:0043567	regulation of insulin-like growth factor receptor signaling pathway	2/113	25/18614	0.010003927155007876	0.16049157421534066	0.14178498261044997	IGFBP3/IGFBP1	2	13.178053097345133
BP	GO:0051016	barbed-end actin filament capping	2/113	25/18614	0.010003927155007876	0.16049157421534066	0.14178498261044997	EPS8/CAPG	2	13.178053097345133
BP	GO:2000193	positive regulation of fatty acid transport	2/113	25/18614	0.010003927155007876	0.16049157421534066	0.14178498261044997	PLA2G4A/PTGES	2	13.178053097345133
BP	GO:0006023	aminoglycan biosynthetic process	3/113	74/18614	0.01033177076866782	0.1633974012917527	0.14435211202837975	HYAL1/HAS2/UST	3	6.678067447978951
BP	GO:0048880	sensory system development	7/113	395/18614	0.01038753523396171	0.1633974012917527	0.14435211202837975	FOXF2/CYP1B1/PTPRM/HIPK2/COL8A2/RARB/TGFB2	7	2.9191889772599975
BP	GO:0046165	alcohol biosynthetic process	4/113	140/18614	0.010494656428040738	0.1633974012917527	0.14435211202837975	QDPR/PLCG2/IP6K3/SPTSSB	4	4.706447534766119
BP	GO:0048662	negative regulation of smooth muscle cell proliferation	3/113	75/18614	0.010715455861859824	0.1633974012917527	0.14435211202837975	IGFBP3/SOD2/NPR3	3	6.5890265486725665
BP	GO:0006517	protein deglycosylation	2/113	26/18614	0.01079495821935646	0.1633974012917527	0.14435211202837975	EDEM3/MAN1A1	2	12.671204901293397
BP	GO:0036119	response to platelet-derived growth factor	2/113	26/18614	0.01079495821935646	0.1633974012917527	0.14435211202837975	HYAL1/HAS2	2	12.671204901293397
BP	GO:0048596	embryonic camera-type eye morphogenesis	2/113	26/18614	0.01079495821935646	0.1633974012917527	0.14435211202837975	FOXF2/HIPK2	2	12.671204901293397
BP	GO:0062009	secondary palate development	2/113	26/18614	0.01079495821935646	0.1633974012917527	0.14435211202837975	COL11A2/TGFB2	2	12.671204901293397
BP	GO:0043523	regulation of neuron apoptotic process	5/113	219/18614	0.010839809791839338	0.1633974012917527	0.14435211202837975	CCND1/PPT1/HIPK2/SOD2/TGFB2	5	3.760859902210369
BP	GO:0051384	response to glucocorticoid	4/113	142/18614	0.011012614533098134	0.1648955482755894	0.14567563785887708	CCND1/CYP1B1/BCKDHB/SMYD3	4	4.640159541318709
BP	GO:0018105	peptidyl-serine phosphorylation	6/113	309/18614	0.011454556100610547	0.16827202784089862	0.14865856140980171	STK38L/SMYD3/HIPK2/GPD1L/PRKD1/VRK1	6	3.1985565770255175
BP	GO:0001937	negative regulation of endothelial cell proliferation	3/113	77/18614	0.011507374727009911	0.16827202784089862	0.14865856140980171	SULF1/PTPRM/CNMD	3	6.417883001953798
BP	GO:0003407	neural retina development	3/113	77/18614	0.011507374727009911	0.16827202784089862	0.14865856140980171	PTPRM/HIPK2/TGFB2	3	6.417883001953798
BP	GO:0042537	benzene-containing compound metabolic process	2/113	27/18614	0.011612717860792201	0.16827202784089862	0.14865856140980171	CYP1B1/KYNU	2	12.201901016060308
BP	GO:0090200	positive regulation of release of cytochrome c from mitochondria	2/113	27/18614	0.011612717860792201	0.16827202784089862	0.14865856140980171	BMF/BID	2	12.201901016060308
BP	GO:0002460	adaptive immune response based on somatic recombination of immune receptors built from immunoglobulin superfamily domains	6/113	311/18614	0.011795987796555657	0.1698319781478462	0.15003668688601496	C4BPA/PLA2G4A/CD80/MICB/C5/CD1D	6	3.1779870813533275
BP	GO:0032958	inositol phosphate biosynthetic process	2/113	28/18614	0.012456858373908267	0.17820448348915902	0.15743330898301766	PLCG2/IP6K3	2	11.766118836915297
BP	GO:0008406	gonad development	5/113	228/18614	0.012728671395291368	0.17907707281390967	0.15820419096134403	CCND1/CYP1B1/TNFAIP6/IRX5/TGFB2	5	3.612404906070486
BP	GO:0032272	negative regulation of protein polymerization	3/113	80/18614	0.012757048820225088	0.17907707281390967	0.15820419096134403	EPS8/KANK1/CAPG	3	6.17721238938053
BP	GO:0032890	regulation of organic acid transport	3/113	80/18614	0.012757048820225088	0.17907707281390967	0.15820419096134403	CLTRN/PLA2G4A/PTGES	3	6.17721238938053
BP	GO:0048705	skeletal system morphogenesis	5/113	229/18614	0.012951437501607009	0.1806765753329773	0.1596172585193149	HYAL1/HAS2/IRX5/RAB23/RARB	5	3.5966302121575144
BP	GO:0008344	adult locomotory behavior	3/113	81/18614	0.013190188649113935	0.1828713809006784	0.16155624173865998	EPS8/PPT1/HIPK2	3	6.100950508030154
BP	GO:0015732	prostaglandin transport	2/113	29/18614	0.013327035224335204	0.1836350988580176	0.16223094218838785	PLA2G4A/PTGES	2	11.360390601159597
BP	GO:0045137	development of primary sexual characteristics	5/113	233/18614	0.013868918708301464	0.18902159275170205	0.16698959663352786	CCND1/CYP1B1/TNFAIP6/IRX5/TGFB2	5	3.5348854874852824
BP	GO:0035023	regulation of Rho protein signal transduction	3/113	83/18614	0.014081478393200945	0.18902159275170205	0.16698959663352786	EPS8/KANK1/KANK2	3	5.953939652414969
BP	GO:0009101	glycoprotein biosynthetic process	6/113	324/18614	0.014192569389205658	0.18902159275170205	0.16698959663352786	TMTC1/EDEM3/CHST10/SOAT1/MAN1A1/UST	6	3.050475254015077
BP	GO:0002825	regulation of T-helper 1 type immune response	2/113	30/18614	0.014222907023614268	0.18902159275170205	0.16698959663352786	PLA2G4A/CD80	2	10.981710914454277
BP	GO:1900027	regulation of ruffle assembly	2/113	30/18614	0.014222907023614268	0.18902159275170205	0.16698959663352786	EPS8/KANK1	2	10.981710914454277
BP	GO:1902914	regulation of protein polyubiquitination	2/113	30/18614	0.014222907023614268	0.18902159275170205	0.16698959663352786	FOXF2/UBE2D1	2	10.981710914454277
BP	GO:0043524	negative regulation of neuron apoptotic process	4/113	155/18614	0.014782861308081261	0.1912116710143479	0.16892440355347324	CCND1/PPT1/HIPK2/SOD2	4	4.250984870111333
BP	GO:0060041	retina development in camera-type eye	4/113	155/18614	0.014782861308081261	0.1912116710143479	0.16892440355347324	CYP1B1/PTPRM/HIPK2/TGFB2	4	4.250984870111333
BP	GO:0018209	peptidyl-serine modification	6/113	327/18614	0.014790574108724327	0.1912116710143479	0.16892440355347324	STK38L/SMYD3/HIPK2/GPD1L/PRKD1/VRK1	6	3.0224892425103516
BP	GO:0052547	regulation of peptidase activity	7/113	425/18614	0.015029687939139957	0.1912116710143479	0.16892440355347324	TFPI/ASPH/PSME1/CYFIP2/BID/SERPINI1/LXN	7	2.7131285788651742
BP	GO:0048284	organelle fusion	4/113	156/18614	0.015102619428334109	0.1912116710143479	0.16892440355347324	CLTRN/TBC1D4/SAMD9/GDAP1	4	4.223734967097799
BP	GO:0034311	diol metabolic process	2/113	31/18614	0.015144135504254735	0.1912116710143479	0.16892440355347324	QDPR/SPTSSB	2	10.627462175278334
BP	GO:1900225	regulation of NLRP3 inflammasome complex assembly	2/113	31/18614	0.015144135504254735	0.1912116710143479	0.16892440355347324	PLCG2/PRKD1	2	10.627462175278334
BP	GO:0033674	positive regulation of kinase activity	7/113	430/18614	0.015927500104211952	0.1912116710143479	0.16892440355347324	CCND1/MMD/CAB39L/RAP1A/PRKD1/CHI3L1/TGFB2	7	2.681580572134184
BP	GO:0033627	cell adhesion mediated by integrin	3/113	87/18614	0.015964643711425797	0.1912116710143479	0.16892440355347324	CYP1B1/EMILIN1/TGFB2	3	5.680195300579799
BP	GO:0007265	Ras protein signal transduction	6/113	333/18614	0.0160389052198185	0.1912116710143479	0.16892440355347324	EPS8/KANK1/KANK2/RAP1A/ELMO1/TGFB2	6	2.9680299768795346
BP	GO:0001516	prostaglandin biosynthetic process	2/113	32/18614	0.016090385494974067	0.1912116710143479	0.16892440355347324	PLA2G4A/PTGES	2	10.295353982300885
BP	GO:0007435	salivary gland morphogenesis	2/113	32/18614	0.016090385494974067	0.1912116710143479	0.16892440355347324	NTN4/TGFB2	2	10.295353982300885
BP	GO:0009072	aromatic amino acid metabolic process	2/113	32/18614	0.016090385494974067	0.1912116710143479	0.16892440355347324	QDPR/KYNU	2	10.295353982300885
BP	GO:0010765	positive regulation of sodium ion transport	2/113	32/18614	0.016090385494974067	0.1912116710143479	0.16892440355347324	GLRX/GPD1L	2	10.295353982300885
BP	GO:0019883	antigen processing and presentation of endogenous antigen	2/113	32/18614	0.016090385494974067	0.1912116710143479	0.16892440355347324	MICB/CD1D	2	10.295353982300885
BP	GO:0031069	hair follicle morphogenesis	2/113	32/18614	0.016090385494974067	0.1912116710143479	0.16892440355347324	DLX3/TGFB2	2	10.295353982300885
BP	GO:0034389	lipid droplet organization	2/113	32/18614	0.016090385494974067	0.1912116710143479	0.16892440355347324	SPART/CDS1	2	10.295353982300885
BP	GO:0046457	prostanoid biosynthetic process	2/113	32/18614	0.016090385494974067	0.1912116710143479	0.16892440355347324	PLA2G4A/PTGES	2	10.295353982300885
BP	GO:0061384	heart trabecula morphogenesis	2/113	32/18614	0.016090385494974067	0.1912116710143479	0.16892440355347324	ADGRG6/TGFB2	2	10.295353982300885
BP	GO:0071295	cellular response to vitamin	2/113	32/18614	0.016090385494974067	0.1912116710143479	0.16892440355347324	KANK2/GDAP1	2	10.295353982300885
BP	GO:0007589	body fluid secretion	3/113	89/18614	0.01695678351433308	0.19686980085307082	0.173923032576294	CCND1/KCNN4/NPR3	3	5.552550462364522
BP	GO:0051591	response to cAMP	3/113	89/18614	0.01695678351433308	0.19686980085307082	0.173923032576294	CYP1B1/BCKDHB/RAP1A	3	5.552550462364522
BP	GO:0006958	complement activation, classical pathway	2/113	33/18614	0.017061324896119202	0.19686980085307082	0.173923032576294	C4BPA/C5	2	9.983373558594797
BP	GO:0007035	vacuolar acidification	2/113	33/18614	0.017061324896119202	0.19686980085307082	0.173923032576294	PPT1/DMXL2	2	9.983373558594797
BP	GO:2000191	regulation of fatty acid transport	2/113	33/18614	0.017061324896119202	0.19686980085307082	0.173923032576294	PLA2G4A/PTGES	2	9.983373558594797
BP	GO:0043010	camera-type eye development	6/113	338/18614	0.017133573651644324	0.19686980085307082	0.173923032576294	FOXF2/CYP1B1/PTPRM/HIPK2/COL8A2/TGFB2	6	2.9241242079907837
BP	GO:0014910	regulation of smooth muscle cell migration	3/113	90/18614	0.01746554042306603	0.19686980085307082	0.173923032576294	CYP1B1/IGFBP3/HAS2	3	5.490855457227138
BP	GO:0009410	response to xenobiotic stimulus	7/113	440/18614	0.017836697429119933	0.19686980085307082	0.173923032576294	CCND1/CYP1B1/QDPR/PTPRM/GSTA4/SOD2/TGFB2	7	2.6206355591311343
BP	GO:0048732	gland development	7/113	441/18614	0.018036126672514533	0.19686980085307082	0.173923032576294	CCND1/CYP1B1/SULF1/QDPR/NTN4/SOD2/TGFB2	7	2.614693074870066
BP	GO:0006026	aminoglycan catabolic process	2/113	34/18614	0.018056624655268295	0.19686980085307082	0.173923032576294	HYAL1/CHI3L1	2	9.689744924518479
BP	GO:0006516	glycoprotein catabolic process	2/113	34/18614	0.018056624655268295	0.19686980085307082	0.173923032576294	EDEM3/MAN1A1	2	9.689744924518479
BP	GO:0007431	salivary gland development	2/113	34/18614	0.018056624655268295	0.19686980085307082	0.173923032576294	NTN4/TGFB2	2	9.689744924518479
BP	GO:0030511	positive regulation of transforming growth factor beta receptor signaling pathway	2/113	34/18614	0.018056624655268295	0.19686980085307082	0.173923032576294	ZEB2/HIPK2	2	9.689744924518479
BP	GO:0032743	positive regulation of interleukin-2 production	2/113	34/18614	0.018056624655268295	0.19686980085307082	0.173923032576294	PLCG2/CD80	2	9.689744924518479
BP	GO:0044546	NLRP3 inflammasome complex assembly	2/113	34/18614	0.018056624655268295	0.19686980085307082	0.173923032576294	PLCG2/PRKD1	2	9.689744924518479
BP	GO:0060317	cardiac epithelial to mesenchymal transition	2/113	34/18614	0.018056624655268295	0.19686980085307082	0.173923032576294	HAS2/TGFB2	2	9.689744924518479
BP	GO:1903846	positive regulation of cellular response to transforming growth factor beta stimulus	2/113	34/18614	0.018056624655268295	0.19686980085307082	0.173923032576294	ZEB2/HIPK2	2	9.689744924518479
BP	GO:0007015	actin filament organization	7/113	442/18614	0.018237127382791526	0.19787723720652062	0.1748130440709994	EPS8/CYFIP2/CFL2/KANK1/CAPG/ELMO1/ARHGAP18	7	2.6087774796780523
BP	GO:0000082	G1/S transition of mitotic cell cycle	5/113	251/18614	0.018539938413929084	0.19925987618639096	0.17603452529003466	CCND1/PSME1/HYAL1/KANK2/BID	5	3.281387723442513
BP	GO:0031960	response to corticosteroid	4/113	166/18614	0.018541992040496755	0.19925987618639096	0.17603452529003466	CCND1/CYP1B1/BCKDHB/SMYD3	4	3.9692931016099795
BP	GO:1902904	negative regulation of supramolecular fiber organization	4/113	167/18614	0.018910469792922765	0.2011932942466485	0.17774258783096614	EPS8/EMILIN1/KANK1/CAPG	4	3.9455248794446502
BP	GO:0032956	regulation of actin cytoskeleton organization	6/113	346/18614	0.018990640418650704	0.2011932942466485	0.17774258783096614	EPS8/CYFIP2/CFL2/KANK1/CAPG/ARHGAP18	6	2.8565143997135403
BP	GO:1904062	regulation of monoatomic cation transmembrane transport	6/113	346/18614	0.018990640418650704	0.2011932942466485	0.17774258783096614	GLRX/PLCG2/JPH1/GPD1L/KCNN4/PRKD1	6	2.8565143997135403
BP	GO:0048730	epidermis morphogenesis	2/113	36/18614	0.0201190041289073	0.21017341057453862	0.18567599893752884	DLX3/TGFB2	2	9.15142576204523
BP	GO:0050931	pigment cell differentiation	2/113	36/18614	0.0201190041289073	0.21017341057453862	0.18567599893752884	ZEB2/SOD2	2	9.15142576204523
BP	GO:0140632	inflammasome complex assembly	2/113	36/18614	0.0201190041289073	0.21017341057453862	0.18567599893752884	PLCG2/PRKD1	2	9.15142576204523
BP	GO:0010950	positive regulation of endopeptidase activity	4/113	171/18614	0.02042975564730971	0.21243162585119266	0.18767100095116376	ASPH/PSME1/CYFIP2/BID	4	3.8532318998085184
BP	GO:0045807	positive regulation of endocytosis	3/113	96/18614	0.020696308541703266	0.21321495741992594	0.18836302888717274	PPT1/PLCG2/RAB31	3	5.147676991150442
BP	GO:0010934	macrophage cytokine production	2/113	37/18614	0.021185440757620834	0.21321495741992594	0.18836302888717274	PLCG2/TGFB2	2	8.904089930638602
BP	GO:0010935	regulation of macrophage cytokine production	2/113	37/18614	0.021185440757620834	0.21321495741992594	0.18836302888717274	PLCG2/TGFB2	2	8.904089930638602
BP	GO:0031076	embryonic camera-type eye development	2/113	37/18614	0.021185440757620834	0.21321495741992594	0.18836302888717274	FOXF2/HIPK2	2	8.904089930638602
BP	GO:0033280	response to vitamin D	2/113	37/18614	0.021185440757620834	0.21321495741992594	0.18836302888717274	KANK2/GDAP1	2	8.904089930638602
BP	GO:0038179	neurotrophin signaling pathway	2/113	37/18614	0.021185440757620834	0.21321495741992594	0.18836302888717274	CYFIP2/RAP1A	2	8.904089930638602
BP	GO:0046466	membrane lipid catabolic process	2/113	37/18614	0.021185440757620834	0.21321495741992594	0.18836302888717274	CYP1B1/PPT1	2	8.904089930638602
BP	GO:0014909	smooth muscle cell migration	3/113	97/18614	0.021264537160313186	0.21321495741992594	0.18836302888717274	CYP1B1/IGFBP3/HAS2	3	5.094608156190128
BP	GO:0003180	aortic valve morphogenesis	2/113	38/18614	0.02227495152522998	0.2209211345324017	0.19517098870205618	EMILIN1/CDH11	2	8.669771774569167
BP	GO:0032885	regulation of polysaccharide biosynthetic process	2/113	38/18614	0.02227495152522998	0.2209211345324017	0.19517098870205618	HAS2/PPP1R3B	2	8.669771774569167
BP	GO:0016055	Wnt signaling pathway	7/113	461/18614	0.022362545743064833	0.2209211345324017	0.19517098870205618	CCND1/DLX3/SULF1/ZEB2/KANK1/PLCG2/IGFBP1	7	2.501257366632753
BP	GO:0060349	bone morphogenesis	3/113	99/18614	0.022426544378177912	0.2209211345324017	0.19517098870205618	HAS2/RAB23/RARB	3	4.991686779297399
BP	GO:0198738	cell-cell signaling by wnt	7/113	463/18614	0.02283154942172554	0.22213312569805083	0.19624171249042782	CCND1/DLX3/SULF1/ZEB2/KANK1/PLCG2/IGFBP1	7	2.490452799174296
BP	GO:0022900	electron transport chain	4/113	177/18614	0.02284628318621983	0.22213312569805083	0.19624171249042782	ASPH/QDPR/BID/SOD2	4	3.7226138693065347
BP	GO:0050680	negative regulation of epithelial cell proliferation	4/113	177/18614	0.02284628318621983	0.22213312569805083	0.19624171249042782	SULF1/PTPRM/CNMD/TGFB2	4	3.7226138693065347
BP	GO:0034446	substrate adhesion-dependent cell spreading	3/113	100/18614	0.02302032534387277	0.22286056345835448	0.19688436149364869	HAS2/KANK1/NTN4	3	4.941769911504425
BP	GO:0090596	sensory organ morphogenesis	5/113	269/18614	0.024148497752659412	0.23141294541124705	0.2044398941276659	FOXF2/PTPRM/HIPK2/COL8A2/RARB	5	3.0618153107214527
BP	GO:0045860	positive regulation of protein kinase activity	6/113	366/18614	0.024226119315502132	0.23141294541124705	0.2044398941276659	CCND1/MMD/CAB39L/RAP1A/CHI3L1/TGFB2	6	2.7004207166690843
BP	GO:0001916	positive regulation of T cell mediated cytotoxicity	2/113	40/18614	0.0245219416775943	0.23141294541124705	0.2044398941276659	MICB/CD1D	2	8.236283185840707
BP	GO:0008210	estrogen metabolic process	2/113	40/18614	0.0245219416775943	0.23141294541124705	0.2044398941276659	CYP1B1/CHST10	2	8.236283185840707
BP	GO:0032570	response to progesterone	2/113	40/18614	0.0245219416775943	0.23141294541124705	0.2044398941276659	CYP1B1/TGFB2	2	8.236283185840707
BP	GO:0051693	actin filament capping	2/113	40/18614	0.0245219416775943	0.23141294541124705	0.2044398941276659	EPS8/CAPG	2	8.236283185840707
BP	GO:0008630	intrinsic apoptotic signaling pathway in response to DNA damage	3/113	103/18614	0.024852769897475802	0.2335536451453165	0.20633107798609068	BID/HIPK2/SOD2	3	4.7978348655382765
BP	GO:0009266	response to temperature stimulus	4/113	183/18614	0.02543023804079377	0.23798464433176167	0.21024560836358008	GMPR/MICB/SOD2/LXN	4	3.600560955558779
BP	GO:0032941	secretion by tissue	2/113	41/18614	0.0256788014007934	0.23931364293021568	0.2114197014216884	KCNN4/NPR3	2	8.035398230088495
BP	GO:0046578	regulation of Ras protein signal transduction	4/113	184/18614	0.02587733647789739	0.24016734598908074	0.21217389848123785	EPS8/KANK1/KANK2/TGFB2	4	3.58099268949596
BP	GO:0070997	neuron death	6/113	373/18614	0.026266695835656283	0.24136851955485653	0.21323506554853283	CCND1/PPT1/BID/HIPK2/SOD2/TGFB2	6	2.649742579895134
BP	GO:0001936	regulation of endothelial cell proliferation	4/113	185/18614	0.026329157297836085	0.24136851955485653	0.21323506554853283	SULF1/PTPRM/PRKD1/CNMD	4	3.5616359722554414
BP	GO:0010952	positive regulation of peptidase activity	4/113	185/18614	0.026329157297836085	0.24136851955485653	0.21323506554853283	ASPH/PSME1/CYFIP2/BID	4	3.5616359722554414
BP	GO:0051258	protein polymerization	5/113	276/18614	0.02659561313106527	0.24282011013159593	0.21451746149789488	EPS8/CYFIP2/KANK1/CAPG/ARHGAP18	5	2.984160574579967
BP	GO:0007264	small GTPase mediated signal transduction	7/113	483/18614	0.02790198587375537	0.2490815993867841	0.22004912351506212	EPS8/KANK1/KANK2/RAP1A/ELMO1/ARHGAP18/TGFB2	7	2.3873284596639732
BP	GO:0003176	aortic valve development	2/113	43/18614	0.028057722459864817	0.2490815993867841	0.22004912351506212	EMILIN1/CDH11	2	7.66165877752624
BP	GO:0016601	Rac protein signal transduction	2/113	43/18614	0.028057722459864817	0.2490815993867841	0.22004912351506212	EPS8/ELMO1	2	7.66165877752624
BP	GO:0019674	NAD metabolic process	2/113	43/18614	0.028057722459864817	0.2490815993867841	0.22004912351506212	KYNU/GPD1L	2	7.66165877752624
BP	GO:0031670	cellular response to nutrient	2/113	43/18614	0.028057722459864817	0.2490815993867841	0.22004912351506212	KANK2/GDAP1	2	7.66165877752624
BP	GO:0071548	response to dexamethasone	2/113	43/18614	0.028057722459864817	0.2490815993867841	0.22004912351506212	CYP1B1/SMYD3	2	7.66165877752624
BP	GO:0097178	ruffle assembly	2/113	43/18614	0.028057722459864817	0.2490815993867841	0.22004912351506212	EPS8/KANK1	2	7.66165877752624
BP	GO:0018107	peptidyl-threonine phosphorylation	3/113	109/18614	0.028747287239696856	0.2532015966288594	0.22368890174129438	HIPK2/PRKD1/CHI3L1	3	4.533733863765527
BP	GO:0032147	activation of protein kinase activity	3/113	109/18614	0.028747287239696856	0.2532015966288594	0.22368890174129438	CAB39L/CHI3L1/TGFB2	3	4.533733863765527
BP	GO:0030308	negative regulation of cell growth	4/113	191/18614	0.02913972465909374	0.2539036332502953	0.22430911031391793	HYAL1/PPT1/SPART/TGFB2	4	3.4497521197238568
BP	GO:0030835	negative regulation of actin filament depolymerization	2/113	44/18614	0.029279181216307425	0.2539036332502953	0.22430911031391793	EPS8/CAPG	2	7.487530168946098
BP	GO:0032881	regulation of polysaccharide metabolic process	2/113	44/18614	0.029279181216307425	0.2539036332502953	0.22430911031391793	HAS2/PPP1R3B	2	7.487530168946098
BP	GO:1905521	regulation of macrophage migration	2/113	44/18614	0.029279181216307425	0.2539036332502953	0.22430911031391793	EMILIN1/C5	2	7.487530168946098
BP	GO:0014812	muscle cell migration	3/113	110/18614	0.029426066548735978	0.2541959441094654	0.2245673499771956	CYP1B1/IGFBP3/HAS2	3	4.492518101367659
BP	GO:0002697	regulation of immune effector process	6/113	384/18614	0.02969976798153577	0.25557731374149173	0.22578770980114915	C4BPA/PLCG2/CD80/MICB/CD1D/TGFB2	6	2.573838495575221
BP	GO:0008637	apoptotic mitochondrial changes	3/113	111/18614	0.03011330600804776	0.2581468904354018	0.22805778153945372	BMF/BID/SOD2	3	4.452044965319302
BP	GO:0008631	intrinsic apoptotic signaling pathway in response to oxidative stress	2/113	45/18614	0.030521575070044615	0.2606519300658563	0.23027083853125516	CYP1B1/SOD2	2	7.321140609636184
BP	GO:0032970	regulation of actin filament-based process	6/113	387/18614	0.030684988064454827	0.26105486057865734	0.23062680423244558	EPS8/CYFIP2/CFL2/KANK1/CAPG/ARHGAP18	6	2.553886259175413
BP	GO:0031334	positive regulation of protein-containing complex assembly	4/113	195/18614	0.031108883757663592	0.2624567403594386	0.23186528358135713	PLCG2/BMF/BID/PRKD1	4	3.378987973678239
BP	GO:0016049	cell growth	7/113	495/18614	0.03128719260076721	0.2624567403594386	0.23186528358135713	HYAL1/IGFBP3/CYFIP2/PPT1/SPART/IGFBP1/TGFB2	7	2.329453830338786
BP	GO:0009063	amino acid catabolic process	3/113	113/18614	0.03151312114435535	0.2624567403594386	0.23186528358135713	QDPR/KYNU/BCKDHB	3	4.373247709295951
BP	GO:0022898	regulation of transmembrane transporter activity	5/113	289/18614	0.03154947410076956	0.2624567403594386	0.23186528358135713	CLTRN/GLRX/PLCG2/JPH1/GPD1L	5	2.849924977799553
BP	GO:0002455	humoral immune response mediated by circulating immunoglobulin	2/113	46/18614	0.031784609696245456	0.2624567403594386	0.23186528358135713	C4BPA/C5	2	7.16198537899192
BP	GO:0014911	positive regulation of smooth muscle cell migration	2/113	46/18614	0.031784609696245456	0.2624567403594386	0.23186528358135713	CYP1B1/HAS2	2	7.16198537899192
BP	GO:0035272	exocrine system development	2/113	46/18614	0.031784609696245456	0.2624567403594386	0.23186528358135713	NTN4/TGFB2	2	7.16198537899192
BP	GO:0042088	T-helper 1 type immune response	2/113	46/18614	0.031784609696245456	0.2624567403594386	0.23186528358135713	PLA2G4A/CD80	2	7.16198537899192
BP	GO:0019882	antigen processing and presentation	3/113	114/18614	0.03222567257345216	0.2641564255473487	0.23336685670748106	PSME1/MICB/CD1D	3	4.3348858872845835
BP	GO:0033559	unsaturated fatty acid metabolic process	3/113	114/18614	0.03222567257345216	0.2641564255473487	0.23336685670748106	CYP1B1/PLA2G4A/PTGES	3	4.3348858872845835
BP	GO:0010837	regulation of keratinocyte proliferation	2/113	47/18614	0.03306799351596671	0.2662032739672445	0.23517512838180435	HAS2/PRKD1	2	7.009602711353794
BP	GO:0046677	response to antibiotic	2/113	47/18614	0.03306799351596671	0.2662032739672445	0.23517512838180435	HYAL1/PLA2G4A	2	7.009602711353794
BP	GO:0061383	trabecula morphogenesis	2/113	47/18614	0.03306799351596671	0.2662032739672445	0.23517512838180435	ADGRG6/TGFB2	2	7.009602711353794
BP	GO:0090199	regulation of release of cytochrome c from mitochondria	2/113	47/18614	0.03306799351596671	0.2662032739672445	0.23517512838180435	BMF/BID	2	7.009602711353794
BP	GO:0140353	lipid export from cell	2/113	47/18614	0.03306799351596671	0.2662032739672445	0.23517512838180435	PLA2G4A/PTGES	2	7.009602711353794
BP	GO:0048562	embryonic organ morphogenesis	5/113	294/18614	0.03359913636497659	0.26898344604926194	0.23763124891168336	FOXF2/HYAL1/IRX5/HIPK2/RARB	5	2.8014568659322134
BP	GO:0001935	endothelial cell proliferation	4/113	201/18614	0.03420678408142006	0.26898344604926194	0.23763124891168336	SULF1/PTPRM/PRKD1/CNMD	4	3.2781226610311274
BP	GO:0007626	locomotory behavior	4/113	201/18614	0.03420678408142006	0.26898344604926194	0.23763124891168336	EPS8/PPT1/HIPK2/SOD2	4	3.2781226610311274
BP	GO:0032309	icosanoid secretion	2/113	48/18614	0.03437143767414879	0.26898344604926194	0.23763124891168336	PLA2G4A/PTGES	2	6.863569321533923
BP	GO:0042311	vasodilation	2/113	48/18614	0.03437143767414879	0.26898344604926194	0.23763124891168336	SOD2/NPR3	2	6.863569321533923
BP	GO:0046189	phenol-containing compound biosynthetic process	2/113	48/18614	0.03437143767414879	0.26898344604926194	0.23763124891168336	ZEB2/TGFB2	2	6.863569321533923
BP	GO:0048066	developmental pigmentation	2/113	48/18614	0.03437143767414879	0.26898344604926194	0.23763124891168336	ZEB2/SOD2	2	6.863569321533923
BP	GO:1903426	regulation of reactive oxygen species biosynthetic process	2/113	48/18614	0.03437143767414879	0.26898344604926194	0.23763124891168336	PLCG2/SOD2	2	6.863569321533923
BP	GO:0051056	regulation of small GTPase mediated signal transduction	5/113	298/18614	0.03529741837458483	0.27527083912957473	0.24318579545355415	EPS8/KANK1/KANK2/ARHGAP18/TGFB2	5	2.763853418067352
BP	GO:0019884	antigen processing and presentation of exogenous antigen	2/113	49/18614	0.03569465601777391	0.2754989601921657	0.2433873271604407	PSME1/CD1D	2	6.723496478237313
BP	GO:0033628	regulation of cell adhesion mediated by integrin	2/113	49/18614	0.03569465601777391	0.2754989601921657	0.2433873271604407	CYP1B1/TGFB2	2	6.723496478237313
BP	GO:0046580	negative regulation of Ras protein signal transduction	2/113	49/18614	0.03569465601777391	0.2754989601921657	0.2433873271604407	KANK1/TGFB2	2	6.723496478237313
BP	GO:0018210	peptidyl-threonine modification	3/113	119/18614	0.03591430922412445	0.2762449949225462	0.24404640550639717	HIPK2/PRKD1/CHI3L1	3	4.152747824793634
BP	GO:0006906	vesicle fusion	3/113	120/18614	0.03667710207895143	0.2800872793152227	0.2474408405629633	CLTRN/TBC1D4/SAMD9	3	4.118141592920353
BP	GO:0001914	regulation of T cell mediated cytotoxicity	2/113	50/18614	0.03703736507418573	0.2800872793152227	0.2474408405629633	MICB/CD1D	2	6.5890265486725665
BP	GO:0006692	prostanoid metabolic process	2/113	50/18614	0.03703736507418573	0.2800872793152227	0.2474408405629633	PLA2G4A/PTGES	2	6.5890265486725665
BP	GO:0006693	prostaglandin metabolic process	2/113	50/18614	0.03703736507418573	0.2800872793152227	0.2474408405629633	PLA2G4A/PTGES	2	6.5890265486725665
BP	GO:0048009	insulin-like growth factor receptor signaling pathway	2/113	50/18614	0.03703736507418573	0.2800872793152227	0.2474408405629633	IGFBP3/IGFBP1	2	6.5890265486725665
BP	GO:1901989	positive regulation of cell cycle phase transition	3/113	121/18614	0.03744820973144562	0.28224388945243917	0.24934608033830802	CCND1/HYAL1/PLCG2	3	4.0841073648796895
BP	GO:0006643	membrane lipid metabolic process	4/113	208/18614	0.03804079409315947	0.28463627699805383	0.25145961575729087	CYP1B1/PPT1/PRKD1/SPTSSB	4	3.167801225323349
BP	GO:1901654	response to ketone	4/113	208/18614	0.03804079409315947	0.28463627699805383	0.25145961575729087	CCND1/CYP1B1/SMYD3/TGFB2	4	3.167801225323349
BP	GO:0090174	organelle membrane fusion	3/113	122/18614	0.03822761338909672	0.28463627699805383	0.25145961575729087	CLTRN/TBC1D4/SAMD9	3	4.050631075003627
BP	GO:0060688	regulation of morphogenesis of a branching structure	2/113	51/18614	0.03839928402956826	0.28463627699805383	0.25145961575729087	SULF1/NTN4	2	6.459829949678986
BP	GO:0061082	myeloid leukocyte cytokine production	2/113	51/18614	0.03839928402956826	0.28463627699805383	0.25145961575729087	PLCG2/TGFB2	2	6.459829949678986
BP	GO:0071383	cellular response to steroid hormone stimulus	4/113	209/18614	0.038607890494101876	0.28524119095313427	0.2519940220961982	TFPI/CYP1B1/SMYD3/KANK2	4	3.152644281661515
BP	GO:0002824	positive regulation of adaptive immune response based on somatic recombination of immune receptors built from immunoglobulin superfamily domains	3/113	123/18614	0.03901529353918988	0.2854510624703976	0.2521794313899327	PLA2G4A/MICB/CD1D	3	4.017699115044247
BP	GO:0022612	gland morphogenesis	3/113	123/18614	0.03901529353918988	0.2854510624703976	0.2521794313899327	SULF1/NTN4/TGFB2	3	4.017699115044247
BP	GO:0046474	glycerophospholipid biosynthetic process	4/113	210/18614	0.039179838152925375	0.2854510624703976	0.2521794313899327	PLA2G4A/PLCG2/IP6K3/CDS1	4	3.137631689844079
BP	GO:0032869	cellular response to insulin stimulus	4/113	211/18614	0.039756638383241096	0.2854510624703976	0.2521794313899327	TBC1D4/KANK1/RAB31/IGFBP1	4	3.12276139747515
BP	GO:0071375	cellular response to peptide hormone stimulus	5/113	308/18614	0.03977312038006333	0.2854510624703976	0.2521794313899327	CYP1B1/TBC1D4/KANK1/RAB31/IGFBP1	5	2.674117917480749
BP	GO:0006636	unsaturated fatty acid biosynthetic process	2/113	52/18614	0.03978013470758435	0.2854510624703976	0.2521794313899327	PLA2G4A/PTGES	2	6.335602450646698
BP	GO:0010543	regulation of platelet activation	2/113	52/18614	0.03978013470758435	0.2854510624703976	0.2521794313899327	EMILIN1/PLA2G4A	2	6.335602450646698
BP	GO:0022602	ovulation cycle process	2/113	52/18614	0.03978013470758435	0.2854510624703976	0.2521794313899327	TNFAIP6/TGFB2	2	6.335602450646698
BP	GO:0089718	amino acid import across plasma membrane	2/113	52/18614	0.03978013470758435	0.2854510624703976	0.2521794313899327	CLTRN/SLC7A2	2	6.335602450646698
BP	GO:0002456	T cell mediated immunity	3/113	125/18614	0.04061540174245262	0.2893358071820628	0.2556113776717384	C4BPA/MICB/CD1D	3	3.9534159292035396
BP	GO:0006690	icosanoid metabolic process	3/113	125/18614	0.04061540174245262	0.2893358071820628	0.2556113776717384	CYP1B1/PLA2G4A/PTGES	3	3.9534159292035396
BP	GO:0001822	kidney development	5/113	310/18614	0.0407079764334514	0.2893358071820628	0.2556113776717384	HAS2/SULF1/KANK2/RARB/TGFB2	5	2.6568655438195834
BP	GO:0048260	positive regulation of receptor-mediated endocytosis	2/113	53/18614	0.041179641548171476	0.29139157191042864	0.25742752638663263	PPT1/PLCG2	2	6.216062781766572
BP	GO:0045471	response to ethanol	3/113	126/18614	0.041427787285096544	0.29139157191042864	0.25742752638663263	CCND1/EPS8/SOD2	3	3.922039612305099
BP	GO:0016051	carbohydrate biosynthetic process	4/113	214/18614	0.04151616340665056	0.29139157191042864	0.25742752638663263	HAS2/CHST10/UST/PPP1R3B	4	3.0789843685385825
BP	GO:0030100	regulation of endocytosis	4/113	214/18614	0.04151616340665056	0.29139157191042864	0.25742752638663263	PPT1/PLCG2/RAB31/PRKD1	4	3.0789843685385825
BP	GO:0003014	renal system process	3/113	127/18614	0.04224836432431879	0.29347869921247305	0.2592713821134704	HAS2/SULF1/NPR3	3	3.8911574106334053
BP	GO:0009395	phospholipid catabolic process	2/113	54/18614	0.04259753158649431	0.29347869921247305	0.2592713821134704	PLA2G4A/PLCG2	2	6.100950508030154
BP	GO:0009409	response to cold	2/113	54/18614	0.04259753158649431	0.29347869921247305	0.2592713821134704	GMPR/SOD2	2	6.100950508030154
BP	GO:0051452	intracellular pH reduction	2/113	54/18614	0.04259753158649431	0.29347869921247305	0.2592713821134704	PPT1/DMXL2	2	6.100950508030154
BP	GO:0071320	cellular response to cAMP	2/113	54/18614	0.04259753158649431	0.29347869921247305	0.2592713821134704	CYP1B1/RAP1A	2	6.100950508030154
BP	GO:0071385	cellular response to glucocorticoid stimulus	2/113	54/18614	0.04259753158649431	0.29347869921247305	0.2592713821134704	CYP1B1/SMYD3	2	6.100950508030154
BP	GO:0001558	regulation of cell growth	6/113	420/18614	0.0429548693982787	0.29503558614230574	0.26064680127395895	HYAL1/IGFBP3/PPT1/SPART/IGFBP1/TGFB2	6	2.3532237673830596
BP	GO:0002821	positive regulation of adaptive immune response	3/113	129/18614	0.04391400055888336	0.29610574351613944	0.26159222314661046	PLA2G4A/MICB/CD1D	3	3.83082938876312
BP	GO:0046683	response to organophosphorus	3/113	129/18614	0.04391400055888336	0.29610574351613944	0.26159222314661046	CYP1B1/BCKDHB/RAP1A	3	3.83082938876312
BP	GO:0048706	embryonic skeletal system development	3/113	129/18614	0.04391400055888336	0.29610574351613944	0.26159222314661046	HYAL1/SULF1/IRX5	3	3.83082938876312
BP	GO:0007179	transforming growth factor beta receptor signaling pathway	4/113	218/18614	0.04393016334596286	0.29610574351613944	0.26159222314661046	EMILIN1/ZEB2/HIPK2/TGFB2	4	3.022489242510351
BP	GO:0031529	ruffle organization	2/113	55/18614	0.04403353443205279	0.29610574351613944	0.26159222314661046	EPS8/KANK1	2	5.990024135156879
BP	GO:0043647	inositol phosphate metabolic process	2/113	55/18614	0.04403353443205279	0.29610574351613944	0.26159222314661046	PLCG2/IP6K3	2	5.990024135156879
BP	GO:1900087	positive regulation of G1/S transition of mitotic cell cycle	2/113	55/18614	0.04403353443205279	0.29610574351613944	0.26159222314661046	CCND1/HYAL1	2	5.990024135156879
BP	GO:0010959	regulation of metal ion transport	6/113	423/18614	0.04420361764137804	0.2963621648433883	0.2618187564933154	GLRX/PLCG2/JPH1/GPD1L/KCNN4/PRKD1	6	2.3365342371179314
BP	GO:1901215	negative regulation of neuron death	4/113	219/18614	0.04454579783069074	0.29742231042868233	0.26275533353239267	CCND1/PPT1/HIPK2/SOD2	4	3.008687921768295
BP	GO:0007266	Rho protein signal transduction	3/113	130/18614	0.04475901198793172	0.29742231042868233	0.26275533353239267	EPS8/KANK1/KANK2	3	3.801361470388019
BP	GO:0051209	release of sequestered calcium ion into cytosol	3/113	130/18614	0.04475901198793172	0.29742231042868233	0.26275533353239267	PLCG2/JPH1/PRKD1	3	3.801361470388019
BP	GO:0072330	monocarboxylic acid biosynthetic process	4/113	220/18614	0.04516628417186482	0.29780470983620466	0.2630931611947536	PLA2G4A/UST/MECR/PTGES	4	2.9950120675784393
BP	GO:0019369	arachidonic acid metabolic process	2/113	56/18614	0.04548738224794473	0.29780470983620466	0.2630931611947536	CYP1B1/PLA2G4A	2	5.883059418457648
BP	GO:0051058	negative regulation of small GTPase mediated signal transduction	2/113	56/18614	0.04548738224794473	0.29780470983620466	0.2630931611947536	KANK1/TGFB2	2	5.883059418457648
BP	GO:0072001	renal system development	5/113	320/18614	0.045582442271539576	0.29780470983620466	0.2630931611947536	HAS2/SULF1/KANK2/RARB/TGFB2	5	2.573838495575221
BP	GO:0006661	phosphatidylinositol biosynthetic process	3/113	131/18614	0.045612119405010865	0.29780470983620466	0.2630931611947536	PLCG2/IP6K3/CDS1	3	3.7723434438965073
BP	GO:0051283	negative regulation of sequestering of calcium ion	3/113	131/18614	0.045612119405010865	0.29780470983620466	0.2630931611947536	PLCG2/JPH1/PRKD1	3	3.7723434438965073
BP	GO:0043434	response to peptide hormone	6/113	427/18614	0.04590385933157696	0.2988407769818025	0.26400846633111386	CYP1B1/TBC1D4/QDPR/KANK1/RAB31/IGFBP1	6	2.314646328573501
BP	GO:0044242	cellular lipid catabolic process	4/113	222/18614	0.04642180638406316	0.301339240284988	0.26621571351980244	CYP1B1/PPT1/PLA2G4A/PLCG2	4	2.9680299768795346
BP	GO:0006749	glutathione metabolic process	2/113	57/18614	0.04695880973028162	0.3039466474184799	0.26851920625384756	GSTA4/SOD2	2	5.779847849712778
BP	GO:0030168	platelet activation	3/113	133/18614	0.0473425198910083	0.3046742111037382	0.2691619665044508	EMILIN1/PLA2G4A/PLCG2	3	3.7156164748153566
BP	GO:0051282	regulation of sequestering of calcium ion	3/113	133/18614	0.0473425198910083	0.3046742111037382	0.2691619665044508	PLCG2/JPH1/PRKD1	3	3.7156164748153566
BP	GO:0032409	regulation of transporter activity	5/113	324/18614	0.04762606911932696	0.3052046223453517	0.2696305540239902	CLTRN/GLRX/PLCG2/JPH1/GPD1L	5	2.5420627116792307
BP	GO:0007596	blood coagulation	4/113	224/18614	0.04769671524631275	0.3052046223453517	0.2696305540239902	TFPI/EMILIN1/PLA2G4A/PLCG2	4	2.941529709228824
BP	GO:0048565	digestive tract development	3/113	134/18614	0.048219760322569555	0.3053183348780154	0.2697310124408581	FOXF2/RARB/TGFB2	3	3.687887993660018
BP	GO:0050679	positive regulation of epithelial cell proliferation	4/113	225/18614	0.04834143391243088	0.3053183348780154	0.2697310124408581	CCND1/HYAL1/HAS2/PRKD1	4	2.928456243854474
BP	GO:0042306	regulation of protein import into nucleus	2/113	58/18614	0.04844755408775707	0.3053183348780154	0.2697310124408581	RAB23/PRKD1	2	5.680195300579799
BP	GO:0043616	keratinocyte proliferation	2/113	58/18614	0.04844755408775707	0.3053183348780154	0.2697310124408581	HAS2/PRKD1	2	5.680195300579799
BP	GO:2000649	regulation of sodium ion transmembrane transporter activity	2/113	58/18614	0.04844755408775707	0.3053183348780154	0.2697310124408581	GLRX/GPD1L	2	5.680195300579799
BP	GO:0042391	regulation of membrane potential	6/113	433/18614	0.04853011823305944	0.3053183348780154	0.2697310124408581	GLRX/BID/SPART/GPD1L/KCNN4/SOD2	6	2.282572707392344
BP	GO:1901214	regulation of neuron death	5/113	327/18614	0.049194110903434354	0.30863120974612723	0.2726577449367062	CCND1/PPT1/HIPK2/SOD2/TGFB2	5	2.518741035425293
BP	GO:0046394	carboxylic acid biosynthetic process	5/113	328/18614	0.04972352816646414	0.3107901257007988	0.2745650217678238	PLA2G4A/KYNU/UST/MECR/PTGES	5	2.5110619469026547
BP	GO:0001913	T cell mediated cytotoxicity	2/113	59/18614	0.04995335502136614	0.3107901257007988	0.2745650217678238	MICB/CD1D	2	5.583920803959802
BP	GO:1903053	regulation of extracellular matrix organization	2/113	59/18614	0.04995335502136614	0.3107901257007988	0.2745650217678238	EMILIN1/HAS2	2	5.583920803959802
CC	GO:0062023	collagen-containing extracellular matrix	9/121	415/19518	0.0011309093522161124	0.1922953962552069	0.18817587044281026	EMILIN3/EMILIN1/SULF1/ACAN/NTN4/COL11A2/COL8A2/COL10A1/TGFB2	9	3.498197749676392
CC	GO:0005581	collagen trimer	4/121	85/19518	0.0019326170477910241	0.1922953962552069	0.18817587044281026	EMILIN1/COL11A2/COL8A2/COL10A1	4	7.590860476421974
CC	GO:0043202	lysosomal lumen	4/121	98/19518	0.003241924411727518	0.21504765264459202	0.21044070742792662	MAN2B2/HYAL1/PPT1/ACAN	4	6.583909596896611
CC	GO:0032045	guanyl-nucleotide exchange factor complex	2/121	17/19518	0.004877643297830544	0.21604531331954482	0.2114169953140217	RAP1A/ELMO1	2	18.977151191054933
CC	GO:0001726	ruffle	5/121	181/19518	0.005428274204008664	0.21604531331954482	0.2114169953140217	EPS8/KANK1/PLCG2/CAPG/ARHGAP18	5	4.455960915026711
CC	GO:0098644	complex of collagen trimers	2/121	21/19518	0.0074108836221195365	0.24579430680029793	0.24052867896352886	COL11A2/COL10A1	2	15.362455726092092
CC	GO:0005788	endoplasmic reticulum lumen	6/121	312/19518	0.013211061642702715	0.37557160955683433	0.36752577502255673	IGFBP3/EDEM3/COL11A2/COL8A2/COL10A1/IGFBP1	6	3.1020343293070565
CC	GO:0005775	vacuolar lumen	4/121	176/19518	0.02403696817966263	0.5518496388016276	0.5400274169706486	MAN2B2/HYAL1/PPT1/ACAN	4	3.666040570999249
CC	GO:0032587	ruffle membrane	3/121	101/19518	0.024958023865400244	0.5518496388016276	0.5400274169706486	EPS8/KANK1/PLCG2	3	4.791260944276246
CC	GO:0033017	sarcoplasmic reticulum membrane	2/121	42/19518	0.027926829404238112	0.5521157575990618	0.5402878347306346	ASPH/JPH1	2	7.681227863046046
CC	GO:0005741	mitochondrial outer membrane	4/121	208/19518	0.04063120626772691	0.5521157575990618	0.5402878347306346	BMF/BID/SPART/GDAP1	4	3.1020343293070565
CC	GO:1990204	oxidoreductase complex	3/121	128/19518	0.045396163723824046	0.5521157575990618	0.5402878347306346	GMPR/BCKDHB/GPD1L	3	3.7806043388429753
CC	GO:0031252	cell leading edge	6/121	422/19518	0.047747959529891276	0.5521157575990618	0.5402878347306346	EPS8/PTPRM/KANK1/PLCG2/CAPG/ARHGAP18	6	2.29344718185735
CC	GO:0098636	protein complex involved in cell adhesion	2/121	57/19518	0.048766329620243055	0.5521157575990618	0.5402878347306346	EMILIN1/CD80	2	5.659852109612875
MF	GO:0005201	extracellular matrix structural constituent	7/118	167/18369	1.0239062411852586e-4	0.01443116625512038	0.01375761629087941	EMILIN3/EMILIN1/ACAN/COL11A2/COL8A2/COL10A1/CHI3L1	7	6.525068507053689
MF	GO:0004559	alpha-mannosidase activity	3/118	15/18369	1.1113645608007232e-4	0.01443116625512038	0.01375761629087941	MAN2B2/EDEM3/MAN1A1	3	31.13389830508475
MF	GO:0015923	mannosidase activity	3/118	16/18369	1.3614307787849415e-4	0.01443116625512038	0.01375761629087941	MAN2B2/EDEM3/MAN1A1	3	29.18802966101695
MF	GO:0004553	hydrolase activity, hydrolyzing O-glycosyl compounds	5/118	94/18369	3.4967000896487285e-4	0.027798765712707393	0.026501305942600892	MAN2B2/HYAL1/EDEM3/MAN1A1/GLB1L3	5	8.280292102416157
MF	GO:0016798	hydrolase activity, acting on glycosyl bonds	5/118	132/18369	0.0016245593384447813	0.08087750204660608	0.07710268318246459	MAN2B2/HYAL1/EDEM3/MAN1A1/GLB1L3	5	5.896571648690292
MF	GO:0015924	mannosyl-oligosaccharide mannosidase activity	2/118	10/18369	0.0017803223720951025	0.08087750204660608	0.07710268318246459	EDEM3/MAN1A1	2	31.133898305084745
MF	GO:0030023	extracellular matrix constituent conferring elasticity	2/118	10/18369	0.0017803223720951025	0.08087750204660608	0.07710268318246459	EMILIN3/EMILIN1	2	31.133898305084745
MF	GO:0030020	extracellular matrix structural constituent conferring tensile strength	3/118	41/18369	0.0023057397445110585	0.09148820387438841	0.08721814867866225	COL11A2/COL8A2/COL10A1	3	11.39045059942125
MF	GO:0097493	structural molecule activity conferring elasticity	2/118	12/18369	0.002589288788897785	0.09148820387438841	0.08721814867866225	EMILIN3/EMILIN1	2	25.944915254237287
MF	GO:0031994	insulin-like growth factor I binding	2/118	13/18369	0.003047247465319041	0.0969024693971455	0.09237971263282987	IGFBP3/IGFBP1	2	23.94915254237288
MF	GO:0005520	insulin-like growth factor binding	2/118	19/18369	0.00651459893238761	0.18833113277266	0.1795410997634097	IGFBP3/IGFBP1	2	16.386262265834077
MF	GO:0061135	endopeptidase regulator activity	5/118	187/18369	0.007183503516865924	0.190362843196947	0.18147798358398123	TFPI/PSME1/C5/SERPINI1/LXN	5	4.1622858696637355
MF	GO:0005540	hyaluronic acid binding	2/118	24/18369	0.010297325092195919	0.2518884137937155	0.2401319535669979	ACAN/TNFAIP6	2	12.972457627118644
MF	GO:0004364	glutathione transferase activity	2/118	26/18369	0.012024710197991633	0.2731327030686671	0.26038470203169856	GSTA4/PTGES	2	11.97457627118644
MF	GO:0043236	laminin binding	2/118	28/18369	0.013869558813612569	0.29403464684858643	0.28031108339090666	NTN4/ADGRG6	2	11.119249394673124
MF	GO:0061134	peptidase regulator activity	5/118	230/18369	0.01646357978861928	0.31519425054432354	0.30048309883073543	TFPI/PSME1/C5/SERPINI1/LXN	5	3.3841193809874723
MF	GO:0001968	fibronectin binding	2/118	31/18369	0.016850007104570755	0.31519425054432354	0.30048309883073543	IGFBP3/TNFAIP6	2	10.04319300164024
MF	GO:0004866	endopeptidase inhibitor activity	4/118	173/18369	0.025463566899070797	0.4117284919088382	0.3925117698435796	TFPI/C5/SERPINI1/LXN	4	3.5992946017439014
MF	GO:0005496	steroid binding	3/118	99/18369	0.02595466384166671	0.4117284919088382	0.3925117698435796	HSD11B1/IRX5/SOAT1	3	4.717257318952234
MF	GO:0030414	peptidase inhibitor activity	4/118	180/18369	0.02889154016428762	0.4117284919088382	0.3925117698435796	TFPI/C5/SERPINI1/LXN	4	3.4593220338983053
MF	GO:0008307	structural constituent of muscle	2/118	42/18369	0.029808123173851547	0.4117284919088382	0.3925117698435796	ASPH/JPH1	2	7.412832929782082
MF	GO:0030246	carbohydrate binding	5/118	273/18369	0.0315258571423686	0.4117284919088382	0.3925117698435796	MAN2B2/ACAN/CLEC3A/PPP1R3B/CHI3L1	5	2.851089588377724
MF	GO:0019208	phosphatase regulator activity	3/118	111/18369	0.03474714003739708	0.4117284919088382	0.3925117698435796	IGFBP3/ZEB2/PPP1R3B	3	4.207283554741182
MF	GO:0008146	sulfotransferase activity	2/118	52/18369	0.044051305601635934	0.4117284919088382	0.3925117698435796	CHST10/UST	2	5.98728813559322
MF	GO:0051287	NAD binding	2/118	52/18369	0.044051305601635934	0.4117284919088382	0.3925117698435796	QDPR/GPD1L	2	5.98728813559322
MF	GO:0033218	amide binding	6/118	400/18369	0.04437163346180835	0.4117284919088382	0.3925117698435796	PLA2G4A/SOAT1/MICB/CD1D/NPR3/TGFB2	6	2.335042372881356
MF	GO:0050661	NADP binding	2/118	53/18369	0.04559088558114961	0.4117284919088382	0.3925117698435796	QDPR/HSD11B1	2	5.874320434921651
MF	GO:0140296	general transcription initiation factor binding	2/118	53/18369	0.04559088558114961	0.4117284919088382	0.3925117698435796	FOXF2/TAF13	2	5.874320434921651
MF	GO:0008374	O-acyltransferase activity	2/118	54/18369	0.0471501347960425	0.4117284919088382	0.3925117698435796	PLA2G4A/SOAT1	2	5.765536723163842
MF	GO:0050840	extracellular matrix binding	2/118	55/18369	0.048728741803330214	0.4117284919088382	0.3925117698435796	NTN4/ADGRG6	2	5.660708782742681

## Sheet: KEGG
	category	subcategory	ID	Description	GeneRatio	BgRatio	pvalue	p.adjust	qvalue	geneID	Count	enrichment_factor
hsa04610	Organismal Systems	Immune system	hsa04610	Complement and coagulation cascades	4/71	88/8538	0.0060557340720223	0.502816795965013	0.486725594613052	7035/722/727/629	4	5.46606914212548
hsa04974	Organismal Systems	Digestive system	hsa04974	Protein digestion and absorption	4/71	105/8538	0.0111737263411777	0.502816795965013	0.486725594613052	1302/1296/1300/3783	4	4.58108651911469
hsa05416	Human Diseases	Cardiovascular disease	hsa05416	Viral myocarditis	3/71	70/8538	0.0202798424223799	0.502816795965013	0.486725594613052	595/941/637	3	5.15372233400402
hsa00062	Metabolism	Lipid metabolism	hsa00062	Fatty acid elongation	2/71	27/8538	0.020929351151665	0.502816795965013	0.486725594613052	5538/51102	2	8.90766823161189
hsa05204	Human Diseases	Cancer: overview	hsa05204	Chemical carcinogenesis - DNA adducts	3/71	71/8538	0.0210508190800482	0.502816795965013	0.486725594613052	1545/3290/2941	3	5.08113469549693
hsa05223	Human Diseases	Cancer: specific types	hsa05223	Non-small cell lung cancer	3/71	73/8538	0.0226407068978874	0.502816795965013	0.486725594613052	595/5336/5915	3	4.94192552575728
hsa05167	Human Diseases	Infectious disease: viral	hsa05167	Kaposi sarcoma-associated herpesvirus infection	5/71	196/8538	0.023245871423815	0.502816795965013	0.486725594613052	595/3455/5336/637/4277	5	3.06769186547859
hsa04115	Cellular Processes	Cell growth and death	hsa04115	p53 signaling pathway	3/71	75/8538	0.0242945357251083	0.502816795965013	0.486725594613052	595/3486/637	3	4.81014084507042
hsa04650	Organismal Systems	Immune system	hsa04650	Natural killer cell mediated cytotoxicity	4/71	134/8538	0.0251052048648942	0.502816795965013	0.486725594613052	3455/5336/637/4277	4	3.58965734706748
hsa05133	Human Diseases	Infectious disease: bacterial	hsa05133	Pertussis	3/71	78/8538	0.0268951162159947	0.502816795965013	0.486725594613052	722/1073/727	3	4.62513542795233
hsa00980	Metabolism	Xenobiotics biodegradation and metabolism	hsa00980	Metabolism of xenobiotics by cytochrome P450	3/71	79/8538	0.0277938932442972	0.502816795965013	0.486725594613052	1545/3290/2941	3	4.56658940987698
hsa04218	Cellular Processes	Cell growth and death	hsa04218	Cellular senescence	4/71	157/8538	0.041370543993487	0.566215207960343	0.548095123283485	595/3486/28996/7042	4	3.06378397775186
hsa05206	Human Diseases	Cancer: overview	hsa05206	MicroRNAs in cancer	6/71	312/8538	0.044657814036801	0.566215207960343	0.548095123283485	595/1545/9839/5336/90427/7042	6	2.31256771397616
hsa00380	Metabolism	Amino acid metabolism	hsa00380	Tryptophan metabolism	2/71	42/8538	0.0474170575491718	0.566215207960343	0.548095123283485	1545/8942	2	5.72635814889336
hsa04070	Environmental Information Processing	Signal transduction	hsa04070	Phosphatidylinositol signaling system	3/71	98/8538	0.0478601536688282	0.566215207960343	0.548095123283485	5336/117283/1040	3	3.6812302385743
hsa04666	Organismal Systems	Immune system	hsa04666	Fc gamma R-mediated phagocytosis	3/71	99/8538	0.0490704151022378	0.566215207960343	0.548095123283485	1073/5321/5336	3	3.64404609475032
