# Supplementary material for: Identification and experimental validation of biomarkers associated with exercise in intervertebral disc degeneration through bulk RNA and single-cell RNA sequencing analysis
Source: Research Square preprint supplement (doi:10.21203/rs.3.rs-8535545/v1), 2026-02-02
Supplement: Supplementary file 2 [file a3d71eb2dadd947da2141f8c.docx]

| Gene numbers | Primer | Sequence | | Product length |
| --- | --- | --- | --- | --- |
| NM_007115 | TNFAIP6 F | TTTCTCTTGCTATGGGAAGACAC | | 126 |
| NM_007115 | TNFAIP6 R | GAGCTTGTATTTGCCAGACCG |  | 126 |
| XM_054333988.1 | CHI3L1 F | GGTCAGGAGGATGCAAGTCC |  | 127 |
| XM_054333988.1 | CHI3L1 R | GAGTGAAGCTCCTCCCGAAG |  | 127 |
| [NM_001256799.3](https://www.ncbi.nlm.nih.gov/entrez/viewer.fcgi?db=nucleotide&id=1676318038" \o "https://www.ncbi.nlm.nih.gov/entrez/viewer.fcgi?db=nucleotide&id=1676318038) | internal reference H-GAPDH F | ATGGGCAGCCGTTAGGAAAG |  | 135 |
| [NM_001256799.3](https://www.ncbi.nlm.nih.gov/entrez/viewer.fcgi?db=nucleotide&id=1676318038" \o "https://www.ncbi.nlm.nih.gov/entrez/viewer.fcgi?db=nucleotide&id=1676318038) | internal reference H-GAPDH R | AGGAAAAGCATCACCCGGAG |  | 135 |

**The primer sequences of RT-qPCR analysis**
