# Supplementary material for: Identification and experimental validation of biomarkers associated with exercise in intervertebral disc degeneration through bulk RNA and single-cell RNA sequencing analysis
Source: Research Square preprint supplement (doi:10.21203/rs.3.rs-8535545/v1), 2026-02-02
Supplement: Supplementary file 3 [file d329f11354ce2c613ef5145a.xlsx]

## Sheet: Sheet1
Exercise-related genes
ABCA3
ABCC9
ACAD9
ACTA1
ACTC1
ADGRL1
AGK
AKAP9
ALDH4A1
ALDOA
AMPD1
AMPD3
ANK2
ATP11A
ATP5F1A
ATP5F1D
ATP5F1E
ATP5MK
ATPAF1
ATPAF2
BCS1L
BICD2
BVES
C1QBP
CACNA1C
CACNA1S
CADM1
CALM1
CALM2
CALM3
CAV3
CAVIN1
CCDC78
CHCHD10
CITED2
COA3
COL12A1
COL13A1
COL9A1
COL9A2
COL9A3
COMP
COQ8A
CPT2
CSF3
DMD
DNA2
DPM3
DPP9
DSP
DUSP6
EGR1
EGR2
EGR4
ELK1
ENO3
EPB41
FAM13A
FARSA
FARSB
FLAD1
GAA
GABRR1
GAD1
GATA4
GATA5
GATA6
GCDH
GIT1
GJA5
GMPPB
GPR37L1
GRB2
GYPC
GYS1
HADHA
HADHB
HINT1
IL16
ISCU
KBTBD13
KCNA5
KCNE1
KCNE2
KCNH2
KCNJ2
KCNJ3
KCNJ5
KCNQ1
KLHL41
LAMP2
LDHA
MAGED1
MAP2K2
MAPK1
MFGE8
MGME1
MIEF2
MLIP
MRPS2
MT-ATP6
MT-ATP8
MT-CO1
MT-CO2
MT-CO3
MT-CYB
MT-ND1
MT-ND4
MT-ND5
MT-ND6
MT-TE
MT-TF
MT-TH
MT-TK
MT-TL1
MT-TN
MT-TQ
MT-TS1
MT-TS2
MT-TW
MUC5B
MYH6
MYL4
MYPN
NDUFS4
NEB
NKX2-5
NKX2-6
NOS1AP
NPPA
NPTX2
NPY
NRTN
NTRK2
NUP155
OBSCN
ODC1
PARN
PCK1
PFKM
PGAM2
PGK1
PGM1
PHKA1
PHKA2
PHKB
PHKG2
PIEZO2
PITX2
PNPLA2
POLG
POLG2
POLR2A
PRKCI
PUS1
PYGL
PYGM
RNASEH1
RRM2B
RSPH4A
RSPH9
RTEL1
RYR1
SCG2
SCN10A
SCN1B
SCN2B
SCN3B
SCN4B
SCN5A
SDHA
SFTPA1
SFTPA2
SFTPC
SLC18A3
SLC22A12
SLC25A20
SLC25A32
SLC25A4
SLC2A9
SLC6A1
SNTA1
SPTA1
SPTB
STN1
SURF1
SVIL
SYN1
TAFAZZIN
TBX20
TBX5
TERC
TERT
TK2
TLL1
TMEM126B
TOP3A
TPM2
TPM3
TRDN
TRMT5
TTN
TWNK
UBE2B
VGF
YARS2
